# Supplementary material
Source: ML conference proceedings conference paper supplement (https://openaccess.thecvf.com/content/CVPRW_2020/html/He_Multi-Domain_Learning_and_CVPRW_2020_paper.html)

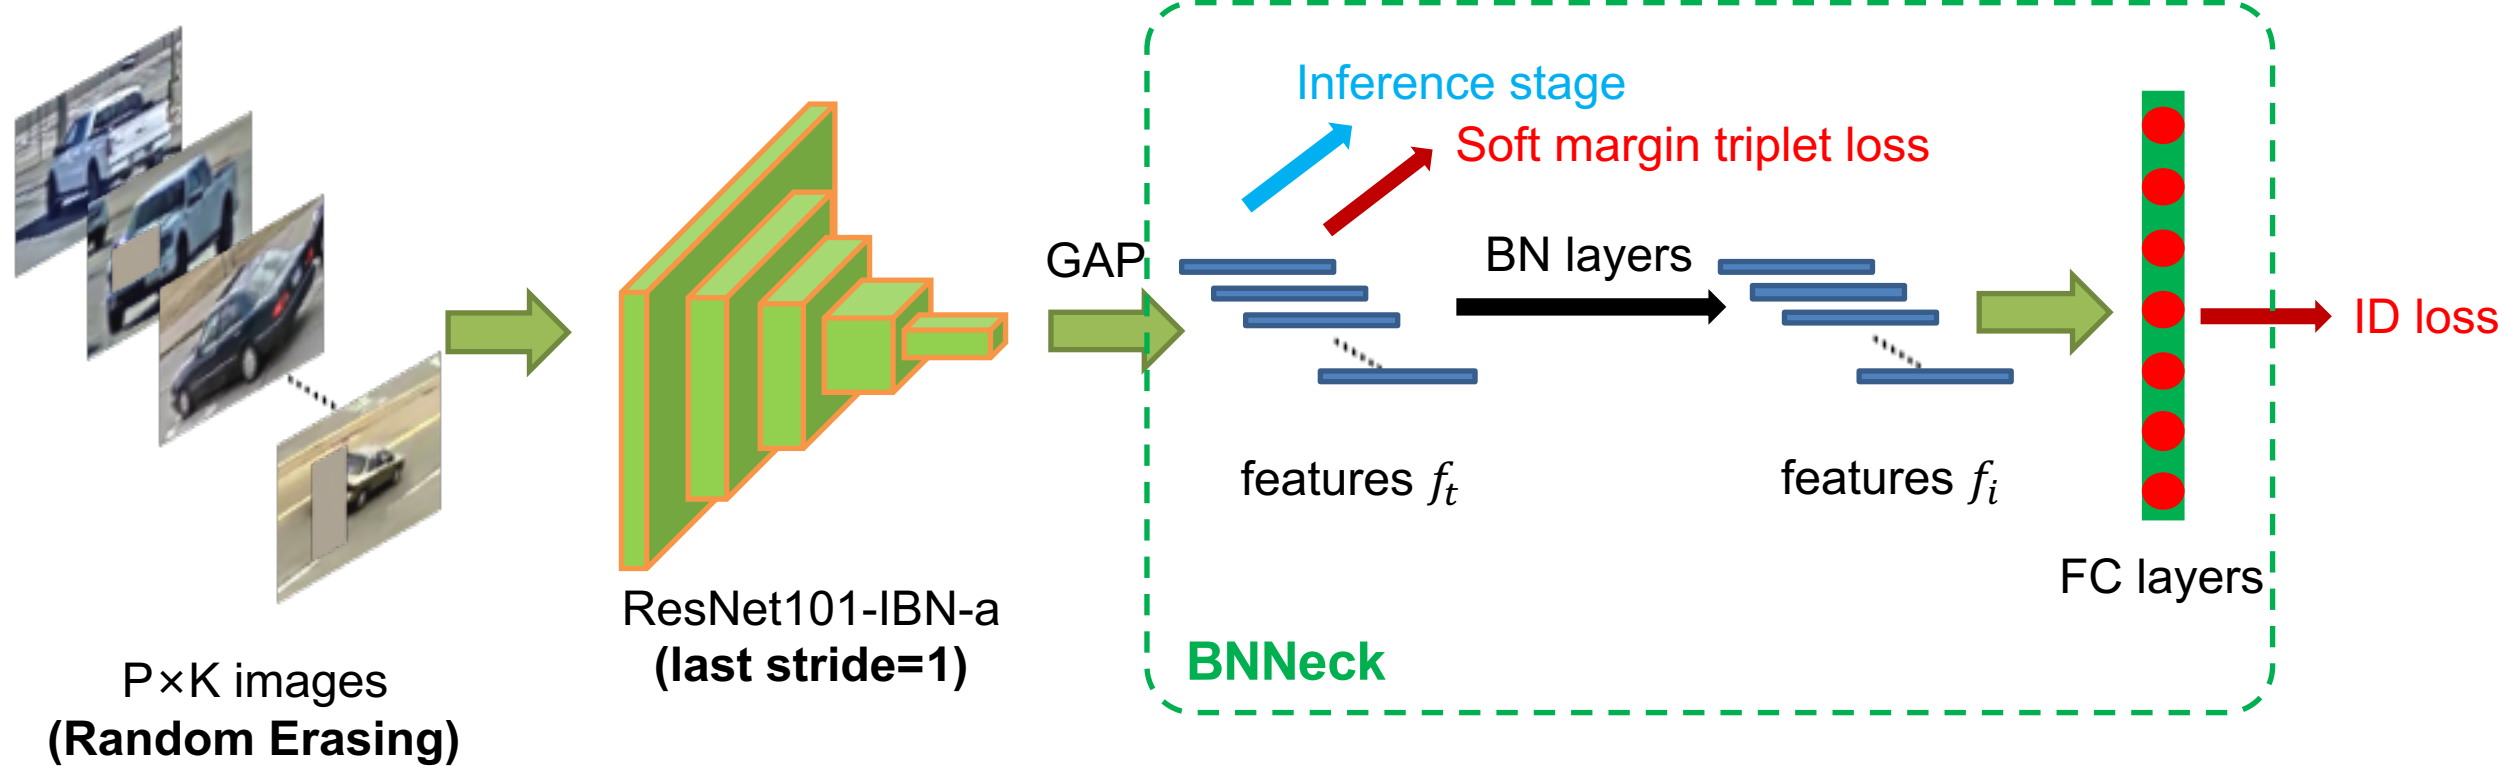

Supplement: Supplementary file 1 [file baseline.pdf › baseline.pdf]

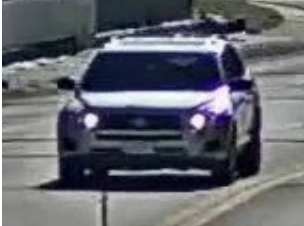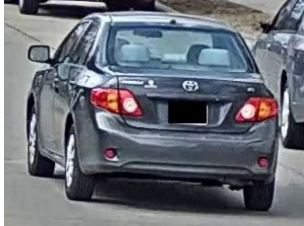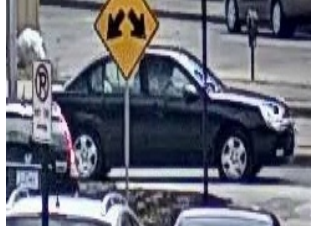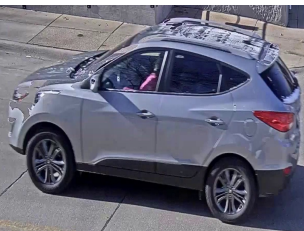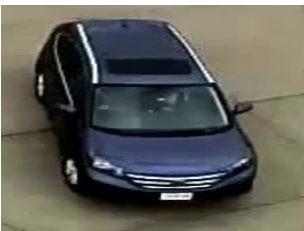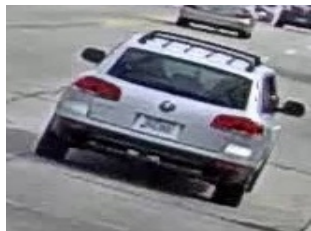

(a) Real-world data (CityFlow)

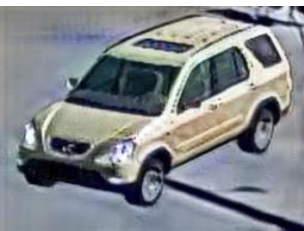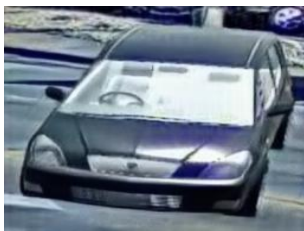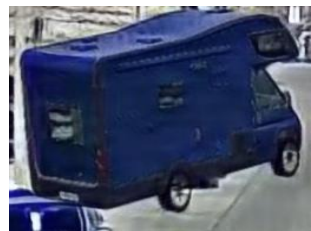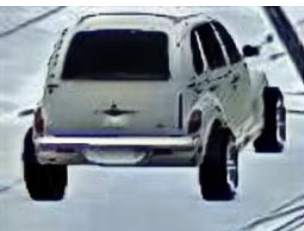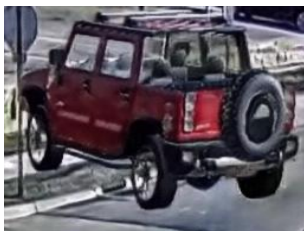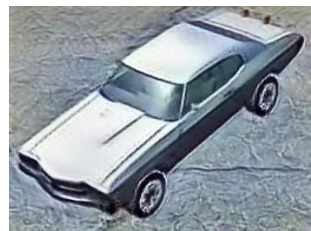

(b) Synthetic data (VehicleX)

Supplement: Supplementary file 2 [file demo.pdf › demo.pdf]

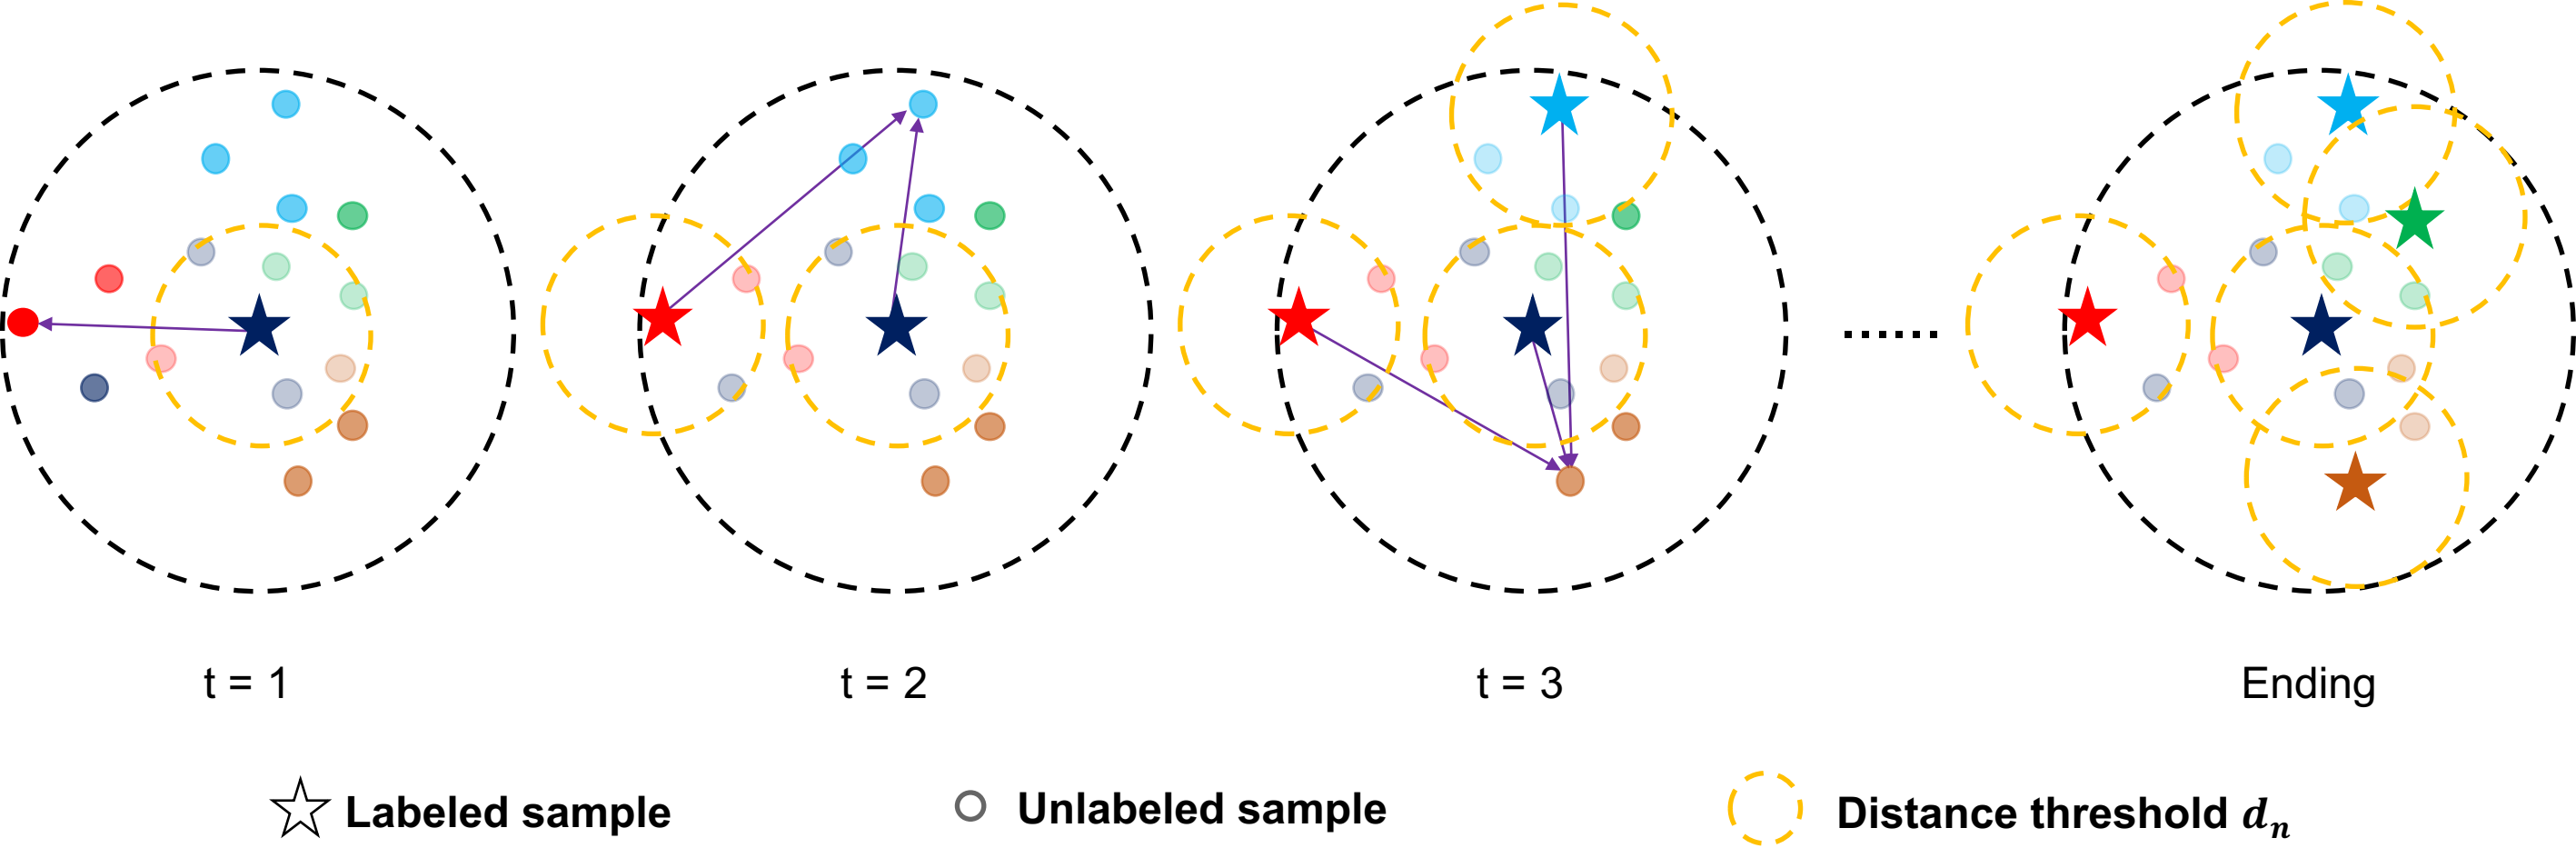

Supplement: Supplementary file 3 [file im.pdf › im.pdf]

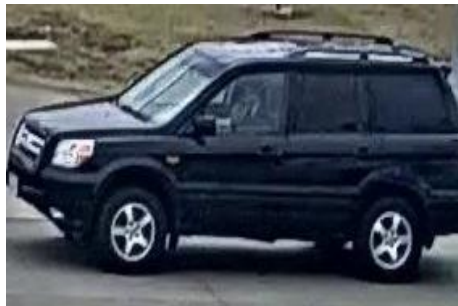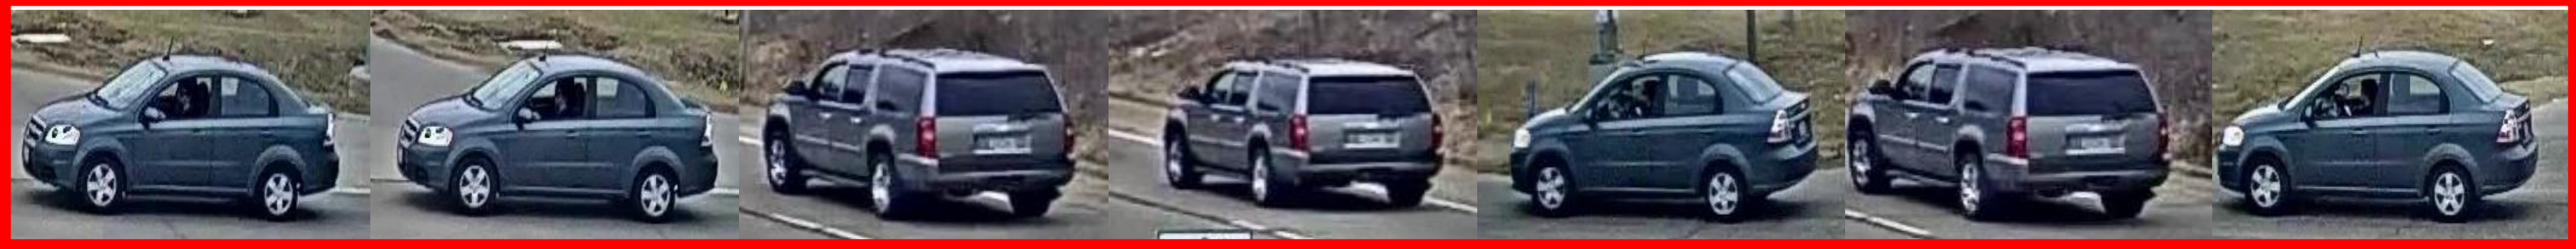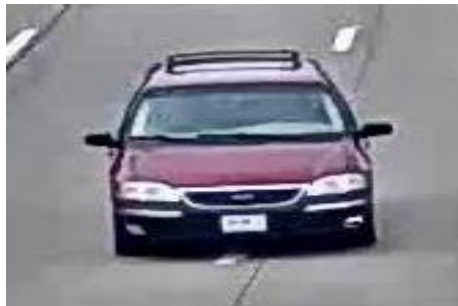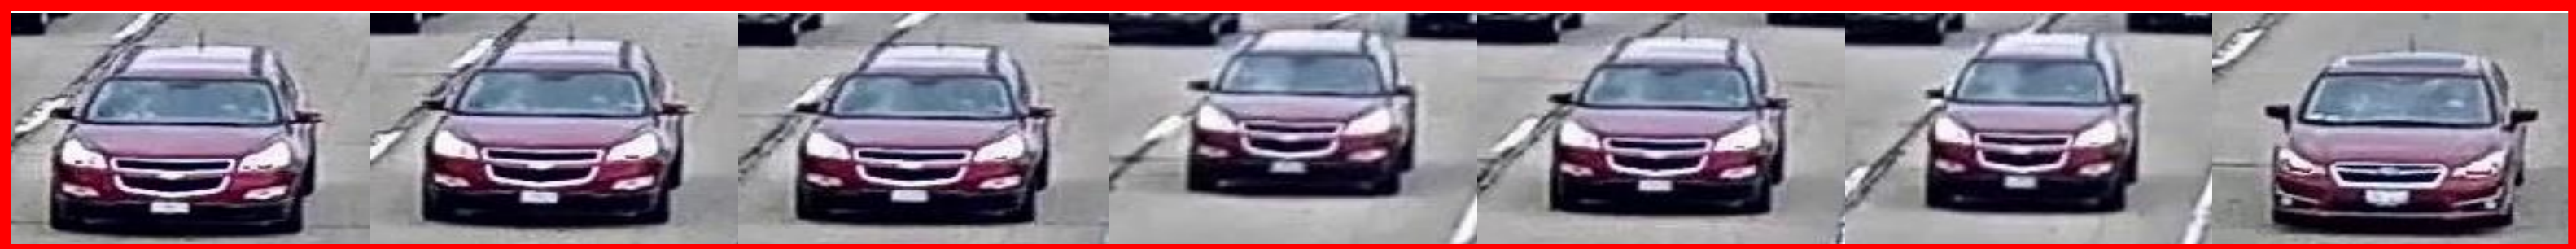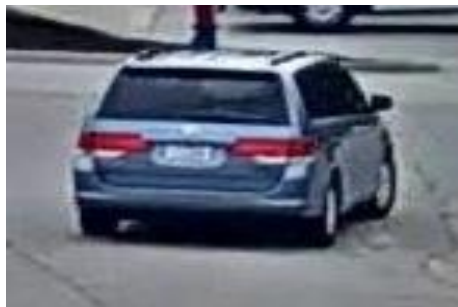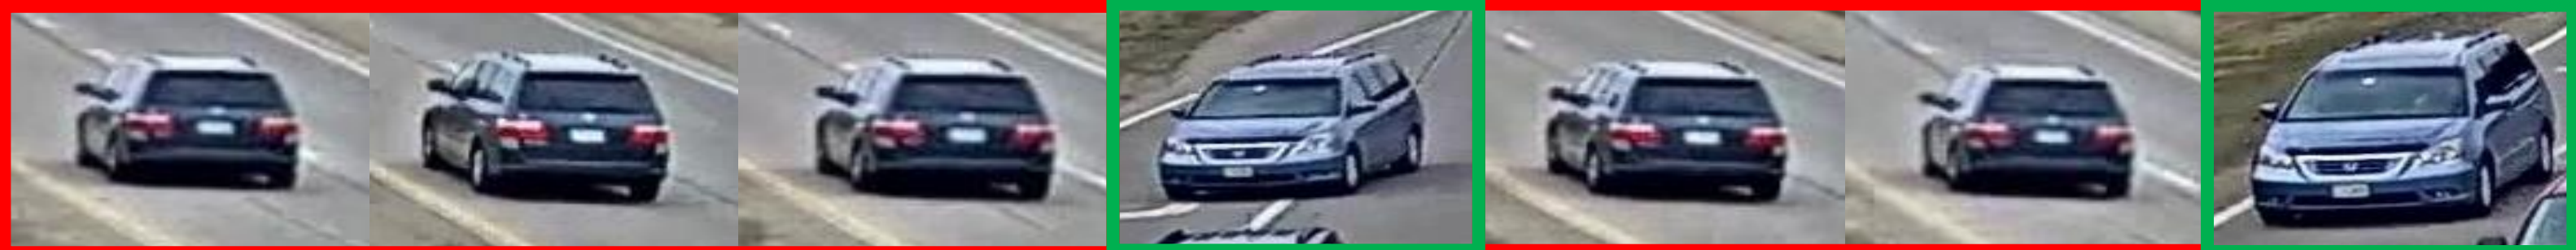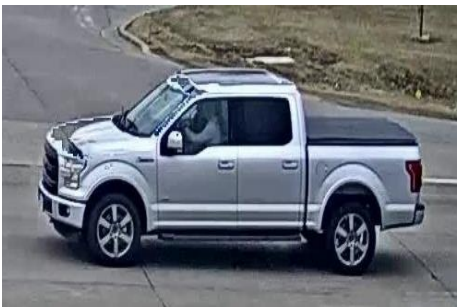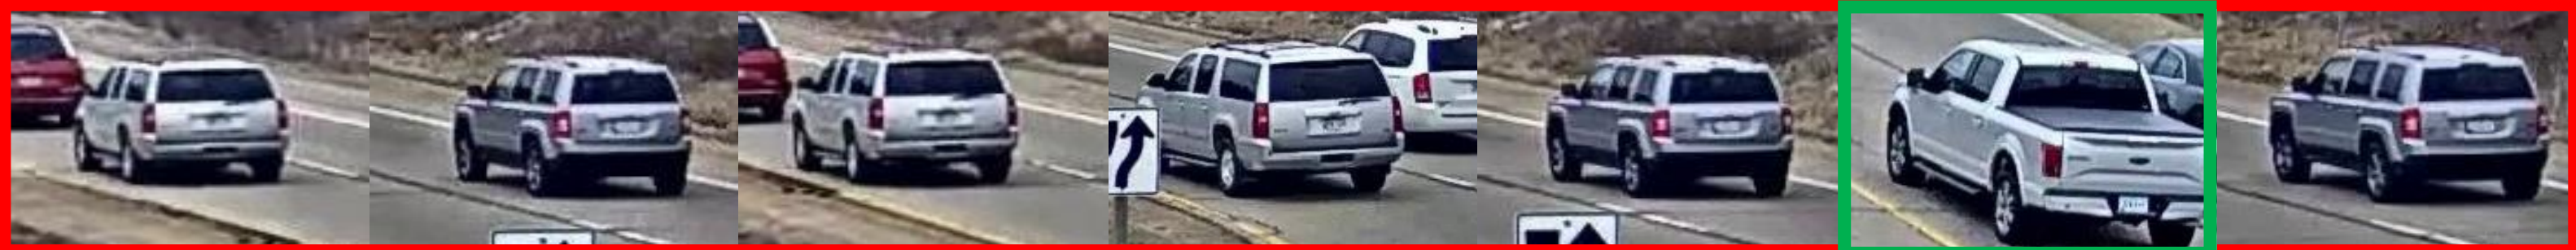

Supplement: Supplementary file 4 [file result1.pdf › result1.pdf]

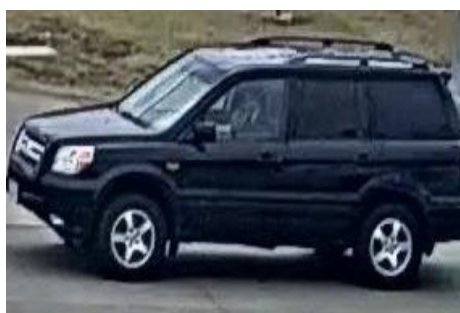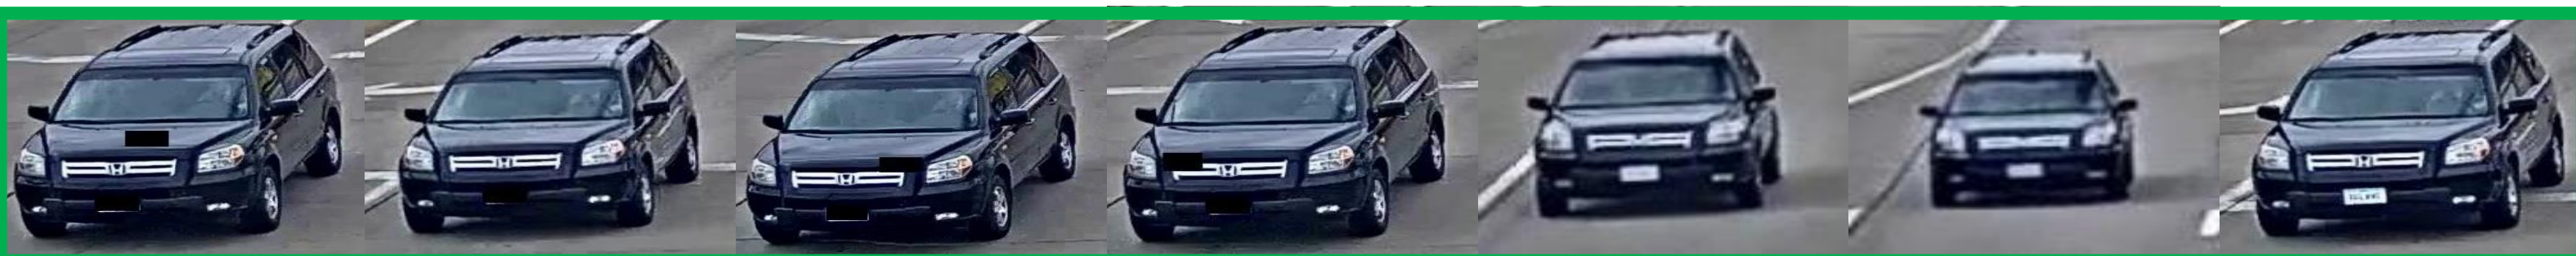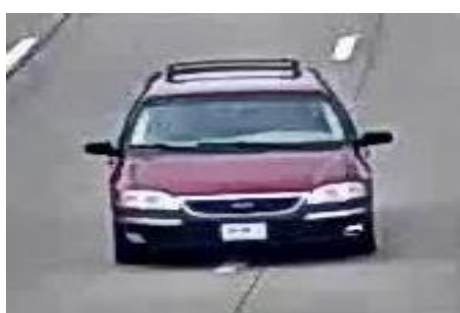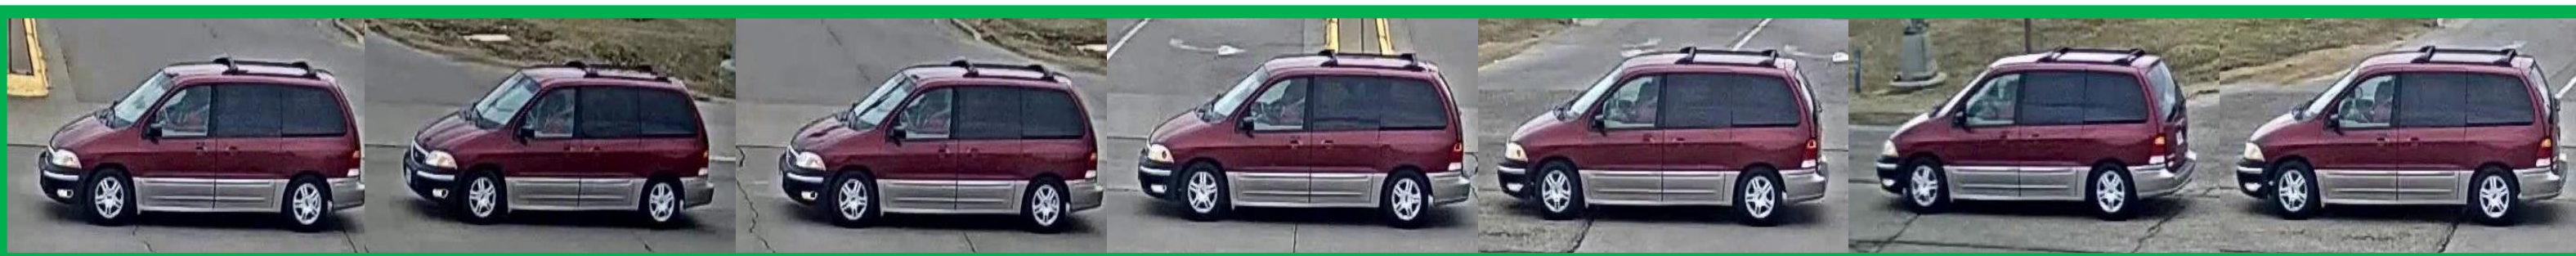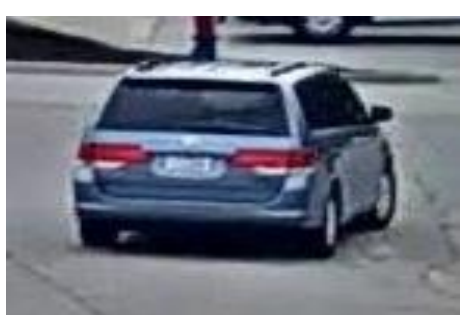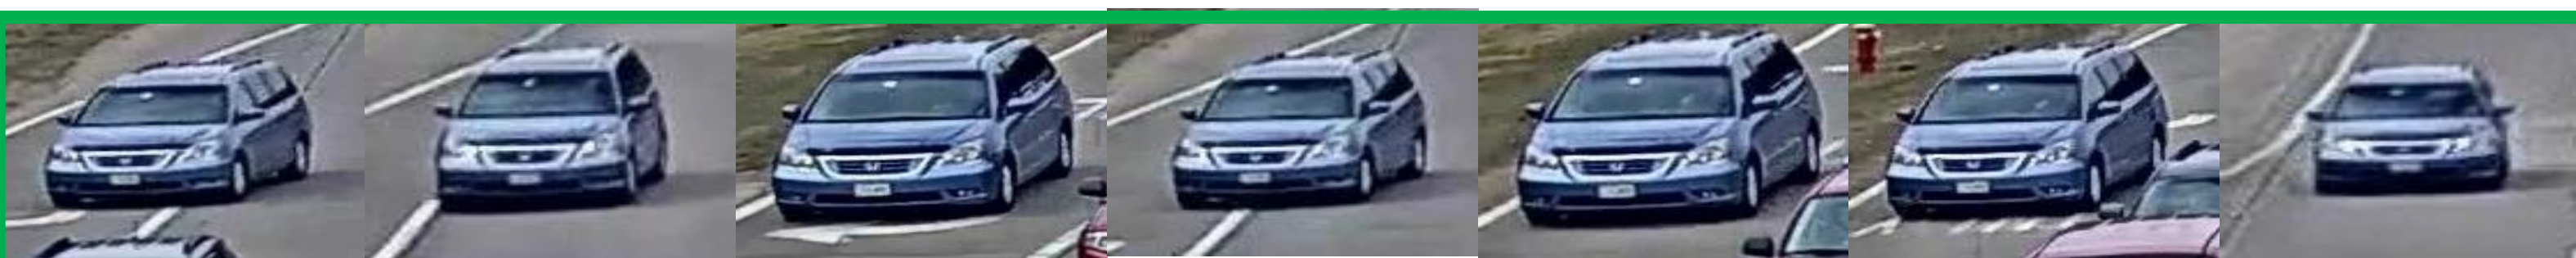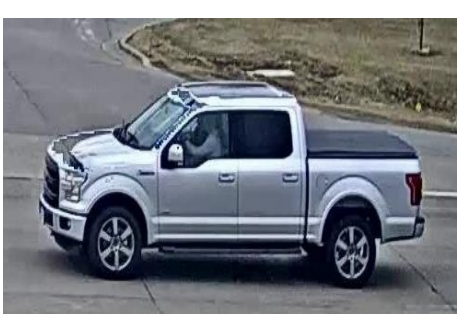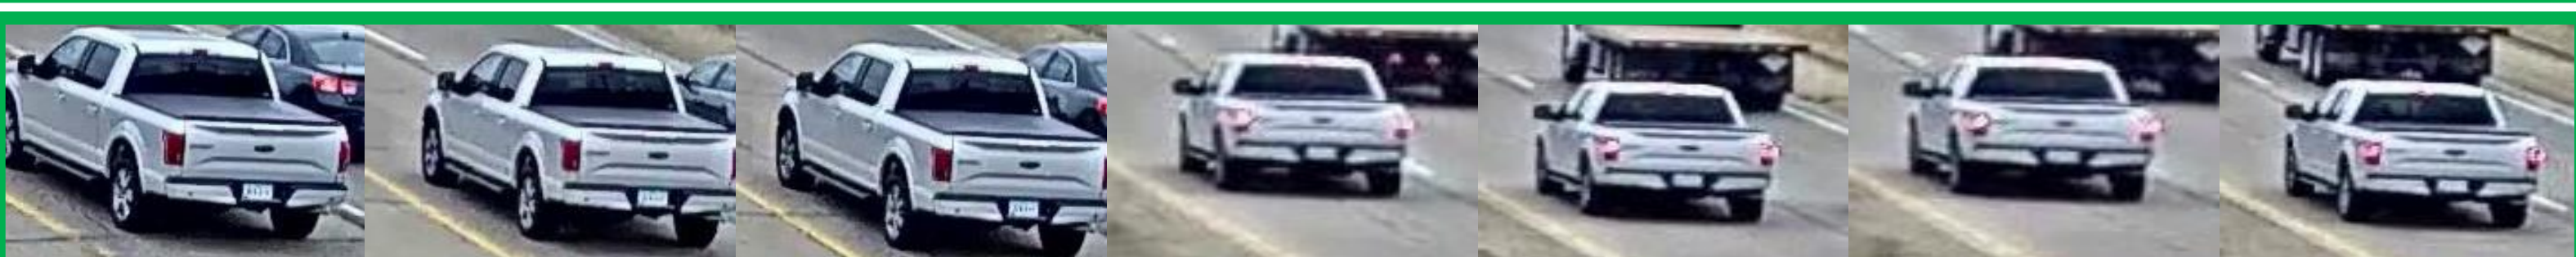

Supplement: Supplementary file 5 [file result2.pdf › result2.pdf]
